# Supplementary material for: Graphene oxide-based probe for detecting deltamethrin and emamectin benzoate pesticides in agricultural run-off
Source: Royal Society of Chemistry journal article supplement (doi:10.1039/d4ew00328d), 2024-01-01
Supplement: d4ew00328d1.pdf [file d4ew00328d1.pdf]

## **Graphene oxide-based probe for detecting Deltamethrin and Emamectin Benzoate Pesticides in Agricultural Run-off**

Suryyia Manzoor<sup>1</sup>, Muhammad Hayat<sup>1</sup>, Hina Raza<sup>2</sup>, Nouredine Elboughdiri<sup>3,4\*</sup>, Muhammad Imran Khan<sup>5</sup>, Zeeshan Ali<sup>1</sup>, Ayesha Javed<sup>1</sup>, Nadeem Raza<sup>6</sup>, Fahad Abdulaziz<sup>7</sup>, Abdallah Shanableh<sup>5,8</sup>

<sup>1</sup>*Institute of Chemical Sciences, Bahauddin Zakariya University, Multan, Pakistan; Email: [suryyia878@gmail.com](mailto:suryyia878@gmail.com), [chaudhry151@gmail.com](mailto:chaudhry151@gmail.com), [al\\_rehman@yahoo.com](mailto:al_rehman@yahoo.com), [aishajavid@yahoo.com](mailto:aishajavid@yahoo.com)*

<sup>2</sup>*Faculty of Pharmacy, Bahauddin Zakariya University, Multan, Pakistan; Email: [hinaraza@bzu.edu.pk](mailto:hinaraza@bzu.edu.pk)*

<sup>3</sup>*Chemical Engineering Department, College of Engineering, University of Ha'il, P.O. Box: 2440, Ha'il 81441, Saudi Arabia*

<sup>4</sup>*Chemical Engineering Process Department, National School of Engineers Gabes, University of Gabes, Gabes 6011, Tunisia; Email: [ghilaninouri@yahoo.fr](mailto:ghilaninouri@yahoo.fr)*

<sup>5</sup>*Research Institute of Sciences and Engineering (RISE), University of Sharjah, Sharjah 27272, United Arab Emirates; Email: [raoimranishaq@gmail.com](mailto:raoimranishaq@gmail.com), [Shanableh@sharjah.ac.ae](mailto:Shanableh@sharjah.ac.ae)*

<sup>6</sup>*Department of Chemistry, College of Science, Imam Mohammad Ibn Saud Islamic University (IMSIU), Riyadh, Saudi Arabia; Email: [nadeemr890@gmail.com](mailto:nadeemr890@gmail.com)*

<sup>7</sup>*Department of Chemistry, College of Science, University of Ha'il, Ha'il 81451, Saudi Arabia; Email: [fah.alanazi@uoh.edu.sa](mailto:fah.alanazi@uoh.edu.sa)*

<sup>8</sup>*Scientific Research Center, Australian University, Kuwait*

\* Correspondence: [ghilaninouri@yahoo.fr](mailto:ghilaninouri@yahoo.fr); [orcid.org/0000-0003-2923-3062](https://orcid.org/0000-0003-2923-3062); 00966549571015

(a)

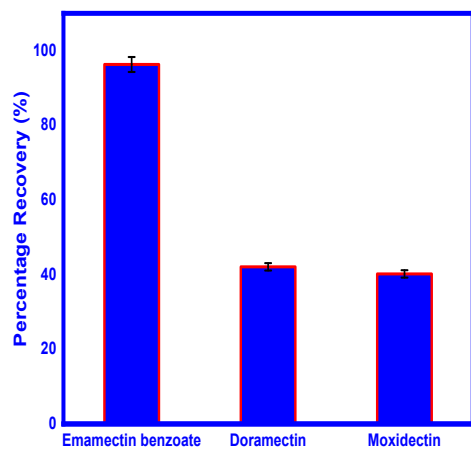

(b)

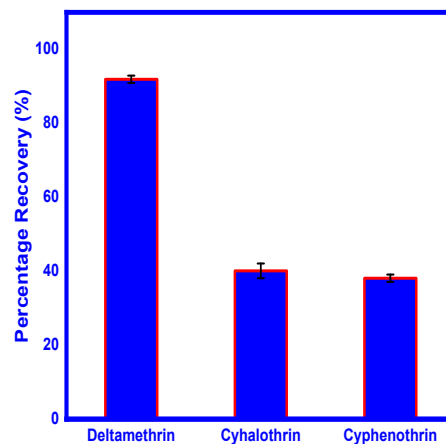

**Figure S1.** Percentage recoveries of (a) emamectin benzoate, doramectin, moxidectin and (b) deltamethrin , cyhalothrin, cyphenothrin.

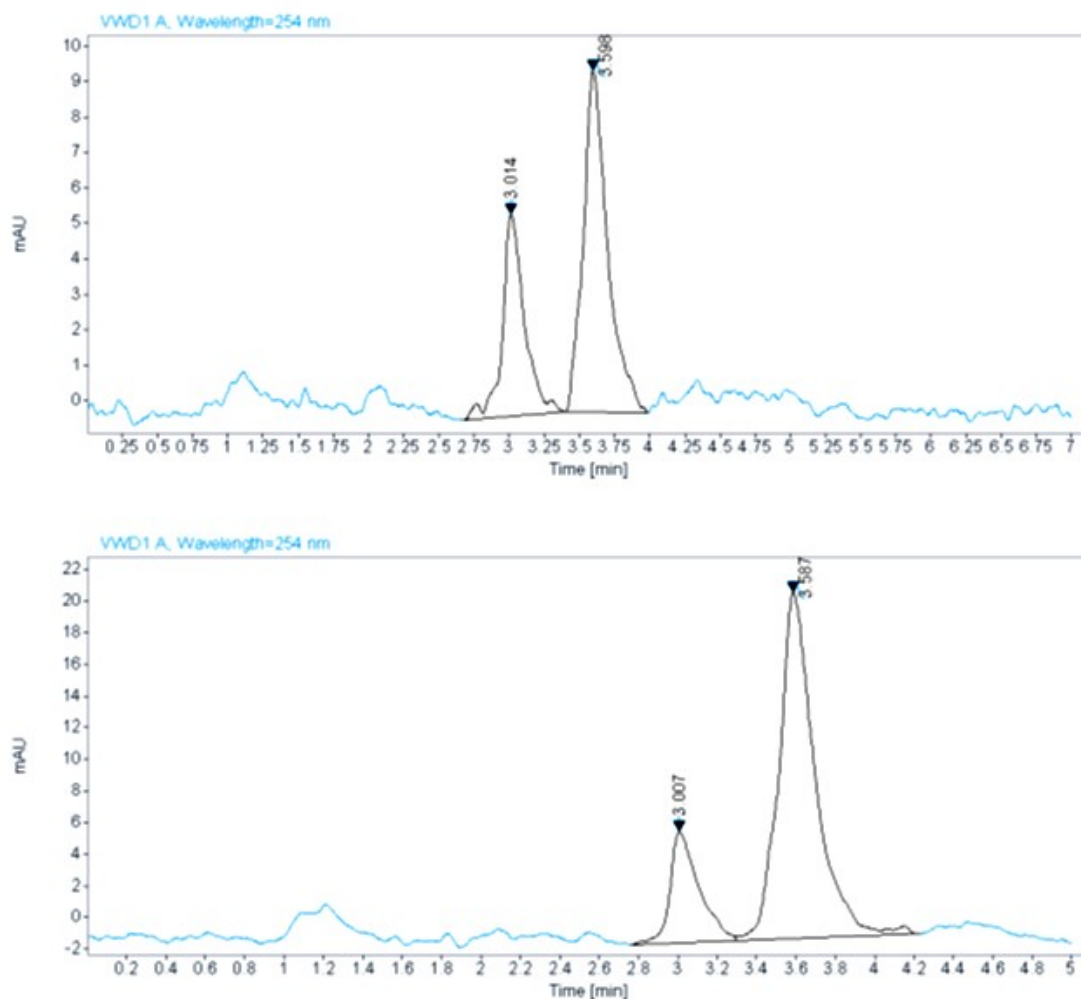

**Figure S2:** a) Chromatogram of real water sample spiked with standard deltamethrin and emamectin benzoate b) Chromatogram of the solution obtained after desorbing the pesticides adsorbed on the MI<sub>ormosil</sub> (Ultra IBD 5-m 250 × 4.6 mm long C<sub>18</sub> column, mobile phase: acetonitrile/water (75:25 v/v) and a flow rate of 1 mL min<sup>-1</sup>).

**Table S 1:** Central composite design for determining the binding capacity ( $q_e$ ) of MI<sub>ormosil</sub> for deltamethrin

| <b>Run</b> | <b>A</b><br><b>Concentration (mg L<sup>-1</sup>)</b> | <b>B</b><br><b>Time (min)</b> | <b>C</b><br><b>pH</b> | <b>q<sub>e</sub></b><br><b>(mg g<sup>-1</sup>)</b> |
|------------|------------------------------------------------------|-------------------------------|-----------------------|----------------------------------------------------|
| 1          | 55                                                   | 17.5                          | 7                     | 31.70                                              |
| 2          | 100                                                  | 5                             | 10                    | 39.07                                              |
| 3          | 55                                                   | 17.5                          | 10                    | 34.27                                              |
| 4          | 55                                                   | 17.5                          | 4                     | 28.82                                              |
| 5          | 10                                                   | 5                             | 4                     | 21.36                                              |
| 6          | 100                                                  | 17.5                          | 7                     | 38.74                                              |
| 7          | 100                                                  | 30                            | 10                    | 42.21                                              |
| 8          | 10                                                   | 30                            | 10                    | 26.61                                              |
| 9          | 55                                                   | 17.5                          | 7                     | 30.84                                              |
| 10         | 55                                                   | 5                             | 7                     | 28.22                                              |
| 11         | 10                                                   | 30                            | 4                     | 25.40                                              |
| 12         | 10                                                   | 5                             | 10                    | 22.17                                              |
| 13         | 100                                                  | 30                            | 4                     | 35.15                                              |
| 14         | 55                                                   | 30                            | 7                     | 35.18                                              |
| 15         | 10                                                   | 17.5                          | 7                     | 23.58                                              |
| 16         | 55                                                   | 17.5                          | 7                     | 31.44                                              |
| 17         | 100                                                  | 5                             | 4                     | 38.30                                              |

**Table S 2:** Central composite design for determining the binding capacity ( $q_e$ ) of MI<sub>ormosil</sub> for emamectin benzoate

| <b>Run</b> | <b>A</b><br><b>Concentration</b><br><b>(mg L<sup>-1</sup>)</b> | <b>B</b><br><b>Time</b><br><b>(min)</b> | <b>C</b><br><b>pH</b> | <b>q<sub>e</sub></b><br><b>(mg g<sup>-1</sup>)</b> |
|------------|----------------------------------------------------------------|-----------------------------------------|-----------------------|----------------------------------------------------|
|------------|----------------------------------------------------------------|-----------------------------------------|-----------------------|----------------------------------------------------|

---

|    |     |      |    |       |
|----|-----|------|----|-------|
| 1  | 55  | 17.5 | 7  | 16.90 |
| 2  | 100 | 5    | 10 | 20.21 |
| 3  | 55  | 17.5 | 10 | 25.21 |
| 4  | 55  | 17.5 | 4  | 12.18 |
| 5  | 10  | 5    | 4  | 2.50  |
| 6  | 100 | 17.5 | 7  | 7.14  |
| 7  | 100 | 30   | 10 | 13.77 |
| 8  | 10  | 30   | 10 | 4.82  |
| 9  | 55  | 17.5 | 7  | 17.02 |
| 10 | 55  | 5    | 7  | 17.80 |
| 11 | 10  | 30   | 4  | 4.40  |
| 12 | 10  | 5    | 10 | 12.91 |
| 13 | 100 | 30   | 4  | 6.10  |
| 14 | 55  | 30   | 7  | 16.82 |
| 15 | 10  | 17.5 | 7  | 4.34  |
| 16 | 55  | 17.5 | 7  | 15.80 |
| 17 | 100 | 5    | 4  | 5.14  |

---
